# Supplementary material
Source: PubMed Central journal article supplement (PMC7269185)
Supplement: NIHMS1544714-supplement-appendix_1.pdf [file NIHMS1544714-supplement-appendix_1.pdf]

|           |           |           |           |           |           |           |
|-----------|-----------|-----------|-----------|-----------|-----------|-----------|
| 8.71E-04  | 3.80E-05  | 4.49E-05  | 3.78E-05  | -3.49E-04 | -1.67E-04 | -1.55E-04 |
| 3.80E-05  | 6.07E-04  | 1.24E-05  | -7.33E-05 | 9.11E-05  | -4.36E-04 | -3.95E-08 |
| 4.49E-05  | 1.24E-05  | 5.25E-04  | -3.43E-07 | -3.11E-04 | -6.76E-06 | 4.89E-05  |
| 3.78E-05  | -7.33E-05 | -3.43E-07 | 4.46E-04  | 7.54E-05  | -5.74E-05 | -2.62E-05 |
| -3.49E-04 | 9.11E-05  | -3.11E-04 | 7.54E-05  | 6.46E-04  | 1.18E-04  | 2.28E-05  |
| -1.67E-04 | -4.36E-04 | -6.76E-06 | -5.74E-05 | 1.18E-04  | 7.08E-04  | -1.08E-05 |
| -1.55E-04 | -3.95E-08 | 4.89E-05  | -2.62E-05 | 2.28E-05  | -1.08E-05 | 5.12E-05  |
